# Supplementary material
Source: PubMed Central journal article supplement (PMC5687916)
Supplement: sph006172402st1.pdf [file sph006172402st1.pdf]

| <b>Year Isolation</b> | <b>N. of strains predicted to be covered</b> | <b>Number of strains</b> | <b>Coverage % (95% CI)</b> |
|-----------------------|----------------------------------------------|--------------------------|----------------------------|
| 2000                  | 54                                           | 61                       | 89% (69% - 95%)            |
| 2001                  | 66                                           | 68                       | 97% (78% - 99%)            |
| 2002                  | 55                                           | 59                       | 93% (66% - 97%)            |
| 2003                  | 52                                           | 59                       | 88% (64% - 97%)            |
| 2004                  | 41                                           | 43                       | 95% (72% - 100%)           |
| 2005                  | 45                                           | 50                       | 90% (80% - 94%)            |
| 2006                  | 28                                           | 32                       | 88% (75% - 94%)            |
| 2007                  | 27                                           | 30                       | 90% (70% - 97%)            |
| 2008                  | 35                                           | 40                       | 88% (73% - 90%)            |
