# Supplementary material
Source: PubMed Central journal article supplement (PMC5687916)
Supplement: sph006172402st2.pdf [file sph006172402st2.pdf]

|                    | <b>Estimate</b> | <b>Std. Error</b> | <b>t value</b> | <b>Pr (&gt; t )</b> |
|--------------------|-----------------|-------------------|----------------|---------------------|
| <b>(Intercept)</b> | 1193.089        | 822.437           | 1.451          | 0.190               |
| <b>Year</b>        | -0.550          | 0.410             | -1.340         | 0.222               |
